# Supplementary material for: Antileishmanial Effect of 1,5- and 1,8-Substituted Fused Naphthyridines
Source: MDPI journal article supplement (doi:10.3390/molecules29010074), 2023-12-22
Supplement: s1 [file s1]

# Supplementary Material

## Antileishmanial Effect of 1,5- and 1,8-Substituted Fused Naphthyridines

Estela Melcón-Fernandez <sup>1</sup>, Endika Martín-Encinas <sup>2</sup>, Francisco Palacios <sup>2</sup>, Gulio Galli <sup>1</sup>, Rosa M. Reguera <sup>1</sup>, María Martínez-Valladares <sup>1</sup>, Rafael Balaña-Fouce <sup>1</sup>, Concepción Alonso <sup>2,\*</sup> and Yolanda Pérez-Pertejo <sup>1,\*</sup>

<sup>1</sup> Departamento de Ciencias Biomédicas, Facultad de Veterinaria, Universidad de León, Campus de Vegazana s/n, 24071 León, Spain; ggal@unileon.es (G.G.)

<sup>2</sup> Departamento de Química Orgánica I, Facultad de Farmacia, Lascaray Research Center, Universidad del País Vasco/Euskal Herriko Unibertsitatea (UPV/EHU), Paseo de la Universidad 7, 01006 Vitoria-Gasteiz, Spain

\* Correspondence: concepcion.alonso@ehu.eus (C.A.); myperp@unileon.es (Y.P.-P.)

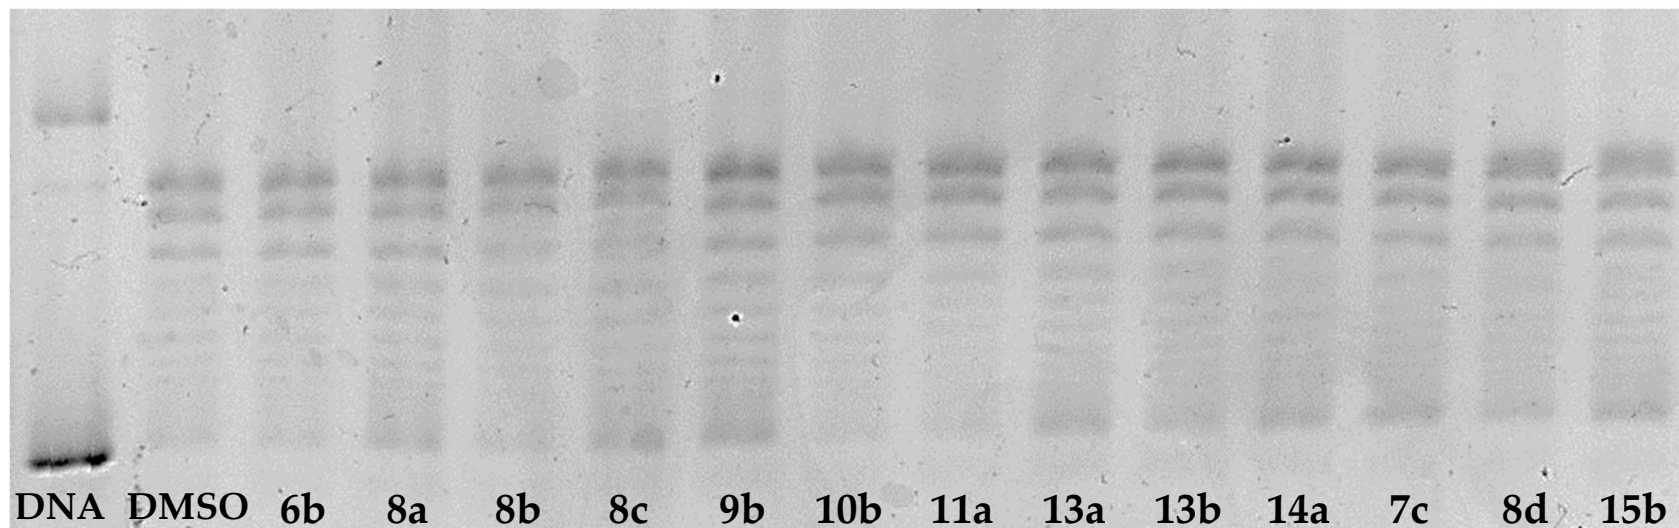

### **Relaxation of supercoiled plasmid DNA assay.**

Each reaction contains one unit of purified leishmanial DNA topoisomerase IB enzyme (LdTopIB), 100  $\mu$ M of compounds, 0.5  $\mu$ g of supercoiled pSK DNA, 10 mM Tris-HCl buffer pH 7.5, 5 mM  $MgCl_2$ , 0.1 mM EDTA, 15  $\mu$ g/mL bovine serum albumin, 150 mM KCl.

Reaction mixtures were incubated 1 min at 37 °C and stopped by the addition of 4  $\mu$ L loading buffer (5% sarkosyl, 0.12% bromophenol blue, 25% glycerol).

The topoisomers were resolved in 1% agarose gels by electrophoresis in 0.1 M Tris borate EDTA buffer (pH 8.0) at 2 V/cm for 16 h and visualized with UV illumination after ethidium bromide (0.5  $\mu$ g/mL) staining.
